# Supplementary material for: Development and Application of Quantitative Detection Method for Viral Hemorrhagic Septicemia Virus (VHSV) Genogroup IVa
Source: MDPI journal article supplement (doi:10.3390/v6052204), 2014-05-23

Supplementary Information

**Figure S1.** Cumulative mortality of flounder after VHSV challenge. The challenged fish died during day 6–22 after VHSV injection and cumulative mortality was estimated as 63.8%.

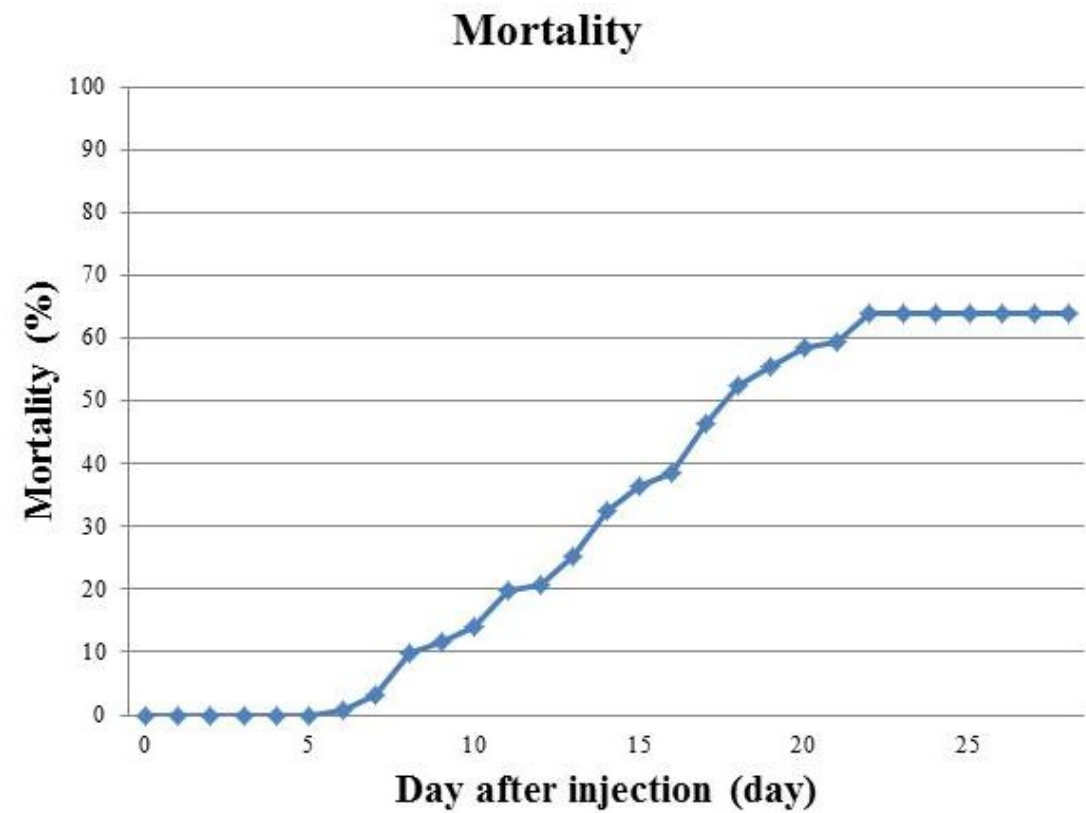

Supplement: s1 [file s1]
